# Supplementary material for: Effects of Ageing in Disinfectant Solution on the Corrosion Resistance and Antimicrobial Behavior of Copper Alloys
Source: MDPI journal article supplement (doi:10.3390/molecules28030981), 2023-01-18
Supplement: s1 [file s1]

*Supplementary Material*

## Effects of Ageing in Disinfectant Solution on the Corrosion Resistance and Antimicrobial Behavior of Copper Alloys

Florica Simescu Lazar <sup>1</sup>, Marius Colin <sup>2</sup>, Gaëlle Carré <sup>2</sup>, Nicolas Bachelard <sup>1</sup>, Jean-Paul Chopart <sup>1,\*</sup> and Sophie C. Gangloff <sup>2</sup>

<sup>1</sup> Laboratoire Matériaux et Ingénierie Mécanique (MATIM), UFR de Sciences Exactes et Naturelles, Université de Reims Champagne-Ardenne, 51687 Reims, France

<sup>2</sup> Biomatériaux et Inflammation en site Osseux (EA 4691 BIOS), SFR CAP-Santé, UFR de Pharmacie, Université de Reims Champagne-Ardenne, 51095 Reims, France

\* Correspondence: jean-paul.chopart@univ-reims.fr

The supplementary materials include four tables noted S1-S10

**Table S1.** Elementary composition (atomic %) of the different samples: Disinfectant on silicon substrate (D/Si), Copper, Former alloy and New alloy.

| Sample/elementary composition | C<br>at% | O<br>at% | N<br>at% | Cl<br>at% | S<br>at% | Na<br>at% | Cu<br>at% | Al*<br>at% | Zn<br>at% | Si<br>at% |
|-------------------------------|----------|----------|----------|-----------|----------|-----------|-----------|------------|-----------|-----------|
| D/Si substrate                | 84.4     | 8.5      | 2.9      | 3         | 0.6      | 0.6       | -         | -          | -         | -         |
| Copper 0h                     | 32.4     | 27.4     | 1.45     | 1.35      | -        | -         | 37        |            |           |           |
| Copper 2h                     | 54.6     | 26.7     | 3.7      | 0.9       | 3.1      | -         | 11.1      |            |           |           |
| Copper 12h                    | 69.5     | 12.4     | 8.6      | 1.4       | 4.4      | -         | 4         |            |           |           |
| Copper 24h                    | 63.8     | 18.7     | 6.9      | 1         | 3        | -         | 7.6       |            |           |           |
| Copper 72h                    | 71.2     | 11.1     | 9.15     | 1.35      | 4.65     | -         | 2.65      |            |           |           |
| Former alloy 0h               | 34.5     | 32.2     | 1.1      | 0.45      | -        | -         | 19.65     | 11.25      |           |           |
| Former alloy 2h               | 55.7     | 22.5     | 7.65     | 1.55      | 2.05     | -         | 7.55      | 3.65       |           |           |
| Former alloy 12h              | 67.55    | 9.65     | 12.85    | 2.5       | 4.5      | -         | 3         | -          |           |           |
| Former alloy 24h              | 68.1     | 13.3     | 9.9      | 1.8       | 3.4      | -         | 3.5       | -          |           |           |
| Former alloy 72h              | 72.15    | 9.45     | 10.1     | 1.6       | 4.55     | -         | 2.2       | -          |           |           |
| New alloy 0h                  | 39.15    | 29.7     | 1.3      | 0.6       | -        |           | 24.0      |            | 0.9       | 3.9       |
| New alloy 2h                  | 61       | 18.35    | 8.4      | 2         | 3.05     |           | 5.9       |            | 0.2       | 1.15      |
| New alloy 12h                 | 68.95    | 10.7     | 11.55    | 2.0       | 4.25     |           | 2.6       |            | -         | -         |
| New alloy 24h                 | 72.0     | 9.5      | 11.2     | 1.7       | 3.7      |           | 1.8       |            | -         | 0.3       |
| New alloy 72h                 | 72.7     | 8.3      | 12.1     | 2.0       | 3.5      |           | 1.5       |            | -         | -         |

\*NB: The at% of Al was calculated from the Cu<sub>3s</sub> peak by subtracting the contribution of the Cu<sub>3s</sub> peak. This contribution was estimated by the ratio of the Cu<sub>3s</sub> / Cu<sub>2p3/2</sub> area peaks with a pure copper.

**Table S2.** Proportion of chemical forms of carbon for: (a) Copper, (b) Former alloy and (c) New alloy, expressed as percentage of form relative to the total area of the peak.

| Sample/Proportion of chemical forms | C-C / C-H | C-O / C-N | C=O/O-C-O | O-C=O |
|-------------------------------------|-----------|-----------|-----------|-------|
| Copper 0h                           | 53        | 29        | 12        | 6     |
| Copper 2h                           | 78        | 15        | 5         | 2     |
| Copper 12h                          | 75*       | 20*       | 4*        | 1*    |
| Copper 24h                          | 51        | 35        | 11        | 3     |
| Copper 72h                          | 86*       | 12*       | 1*        | 1*    |
| Former 0h                           | 63        | 23        | 9         | 5     |
| Former 2h                           | 66        | 22        | 8         | 4     |
| Former 12h                          | 60        | 24        | 14        | 2     |
| Former 24h                          | 71        | 23        | 5         | 1     |
| Former 72h                          | 88        | 11        | -         | 1     |
| New alloy 0h                        | 62        | 26        | 9         | 3     |
| New alloy 2h                        | 75        | 18        | 4         | 3     |
| New alloy 12h                       | 63        | 22        | 13        | 2     |
| New alloy 24h                       | 49        | 37        | 12        | 2     |
| New alloy 72h                       | 54        | 23        | 18        | 5     |

**Table S3.** Proportion of chemical forms of copper on Copper, Former alloy and New alloy surface.

| Samples/<br>chemical forms of copper | Cu 0 | Cu I | Cu II | Satellite |
|--------------------------------------|------|------|-------|-----------|
| Copper 0h                            | ++   | +    | -     | -         |
| Copper 2h                            | -    | ++   | ++    | ++        |
| Copper 12h                           | -    | ++   | ++    | +         |
| Copper 24h                           | -    | +    | +++   | +         |
| Copper 72h                           | -    | +    | +++   | +         |
| Former 0h                            | ++   | +    | -     | -         |
| Former 2h                            | *    | ++   | ++    | +         |
| Former 12h                           | -    | ++   | +++   | +         |
| Former 24h                           | -    | +    | +++   | +++       |
| Former 72h                           | -    | +++  | +     | +         |
| New alloy 0h                         | ++   | +    | -     | -         |
| New alloy 2h                         | *    | ++   | ++    | ++        |
| New alloy 12h                        | -    | ++   | ++    | +         |
| New alloy 24h                        | -    | -    | +++   | +++       |
| New alloy 72h                        | -    | +++  | ++    | +         |

\* slight shoulder on the Auger peak which could correspond to the presence of a small proportion of metal shape.

**Table S4.** Proportion of nitrogen chemical forms for Copper, Former alloy and New alloy.

| Sample/Nitrogen<br>chemical forms | 398 eV | 399-400 eV | ~ 402 eV |
|-----------------------------------|--------|------------|----------|
| Copper 0h                         | 31     | 69         | -        |
| Copper 2h                         | 33     | 34         | 33       |
| Copper 12h                        | 35     | 40         | 26       |
| Copper 24h                        | 35     | 39         | 26       |
| Copper 72h                        | 33     | 39         | 28       |
| Former 0h                         | 48     | 43         | 8        |
| Former 2h                         | 49     | 44         | 7        |
| Former 12h                        | 34     | 47         | 19       |
| Former 24h                        | 36     | 45         | 19       |
| Former 72h                        | 33     | 40         | 27       |
| New alloy 0h                      | 31     | 51         | 18       |
| New alloy 2h                      | 39     | 48         | 13       |
| New alloy 12h                     | 37     | 48         | 15       |
| New alloy 24h                     | 30     | 48         | 22       |
| New alloy 72h                     | 34     | 45         | 21       |

**Table S5.** Proportion of chlorine chemical forms.

| Sample/Chlorine<br>chemical forms | Chlorine<br>(198 eV) | Organic<br>(200.5 eV) |
|-----------------------------------|----------------------|-----------------------|
| D solution                        | 100                  | -                     |
| Copper 0h                         | 100                  | -                     |
| Copper 2h                         | 64                   | 36                    |
| Copper 12h                        | 31                   | 69                    |
| Copper 24h                        | 31                   | 69                    |
| Copper 72h                        | 26                   | 73                    |
| Former 0h                         | 100                  | -                     |
| Former 2h                         | 20                   | 80                    |
| Former 12h                        | 19                   | 81                    |
| Former 24h                        | 28                   | 72                    |
| Former 72h                        | 27                   | 73                    |
| New 0h                            | 100                  | -                     |
| New 2h                            | 43                   | 57                    |
| New 12h                           | 17                   | 83                    |
| New 24h                           | 15                   | 85                    |
| New 72h                           | 15                   | 85                    |

**Table S6.** Proportion of sulfur chemical forms.

| <b>Samples<br/>name</b> | <b>Sulfide<br/>form<br/>(162 eV)</b> | <b>Sulfate and/or<br/>sulfonate forms<br/>(168-169 eV)</b> |
|-------------------------|--------------------------------------|------------------------------------------------------------|
| <b>D solution</b>       | 37                                   | 63                                                         |
| <b>Copper 0h</b>        | -                                    | -                                                          |
| <b>Copper 2h</b>        | 31                                   | 69                                                         |
| <b>Copper 12h</b>       | 42                                   | 58                                                         |
| <b>Copper 24h</b>       | 33                                   | 67                                                         |
| <b>Copper 72h</b>       | 39                                   | 61                                                         |
| <b>Former 0h</b>        | -                                    | -                                                          |
| <b>Former 2h</b>        | 43                                   | 57                                                         |
| <b>Former 12h</b>       | 44                                   | 56                                                         |
| <b>Former 24h</b>       | 29                                   | 71                                                         |
| <b>Former 72h</b>       | 39                                   | 61                                                         |
| <b>New 0h</b>           | -                                    | -                                                          |
| <b>New 2h</b>           | 40                                   | 60                                                         |
| <b>New 12h</b>          | 44                                   | 56                                                         |
| <b>New 24h</b>          | 39                                   | 61                                                         |
| <b>New 72h</b>          | 40                                   | 60                                                         |

**Table S7.** Relative intensity of positive ions: cationic surfactant and unidentified species from D solution.

| Sample                          | N°<br>of<br>tests | Intensity<br>of<br>substrate<br><br><sup>65</sup> Cu<br>(100%) | Cationic surfactant               |                                   |                                   |                                   |            | Unidentified species from<br>solution D |            |             |             |             |
|---------------------------------|-------------------|----------------------------------------------------------------|-----------------------------------|-----------------------------------|-----------------------------------|-----------------------------------|------------|-----------------------------------------|------------|-------------|-------------|-------------|
|                                 |                   |                                                                | C <sub>12</sub> H <sub>26</sub> N | C <sub>16</sub> H <sub>34</sub> N | C <sub>18</sub> H <sub>38</sub> N | C <sub>22</sub> H <sub>48</sub> N | 452<br>uma | 466<br>uma                              | 635<br>uma | 1139<br>uma | 1170<br>uma | 1202<br>uma |
| <b>Copper<br/>0h</b>            | 1 to 3            | 1 469 364                                                      | 0.45                              | 0.24                              | 0.22                              | 4.2                               | 0.14       | 0.62                                    | -          | -           | -           | -           |
|                                 |                   | 1 449 800                                                      |                                   |                                   |                                   |                                   |            |                                         |            |             |             |             |
|                                 |                   | 1 507 234                                                      |                                   |                                   |                                   |                                   |            |                                         |            |             |             |             |
| <b>Copper<br/>72h</b>           | 1 to 3            | 154 036                                                        | 803                               | 259.3                             | 206.6                             | 2573.3                            | 109.3      | 9                                       | 2.56       | 0.31        | 0.54        | 0.1         |
|                                 |                   | 89 813                                                         |                                   |                                   |                                   |                                   |            |                                         |            |             |             |             |
|                                 |                   | 111 941                                                        |                                   |                                   |                                   |                                   |            |                                         |            |             |             |             |
| <b>Former<br/>alloy 0h</b>      | 1 to 3            | 575 605                                                        | 1.13                              | 0.79                              | 0.553                             | 6.53                              | -          | -                                       | -          | -           | -           | -           |
|                                 |                   | 555 940                                                        |                                   |                                   |                                   |                                   |            |                                         |            |             |             |             |
|                                 |                   | 596 888                                                        |                                   |                                   |                                   |                                   |            |                                         |            |             |             |             |
| <b>Former<br/>alloy<br/>72h</b> | 1 to 3            | 95 582                                                         | 1330                              | 389                               | 298.3                             | 3406.66                           | 780        | 23.3                                    | 2.5        | 0.16        | 0.62        | 0.266       |
|                                 |                   | 87 247                                                         |                                   |                                   |                                   |                                   |            |                                         |            |             |             |             |
|                                 |                   | 103 441                                                        |                                   |                                   |                                   |                                   |            |                                         |            |             |             |             |
| <b>New<br/>alloy 0h</b>         | 1 to 3            | 1 435 064                                                      | 1.33                              | 0.35                              | 0.27                              | 12.66                             | -          | -                                       | -          | -           | -           | -           |
|                                 |                   | 1 374 332                                                      |                                   |                                   |                                   |                                   |            |                                         |            |             |             |             |
|                                 |                   | 1 301 584                                                      |                                   |                                   |                                   |                                   |            |                                         |            |             |             |             |
| <b>New<br/>alloy<br/>72h</b>    | 1 to 3            | 132 125                                                        | 1370                              | 420                               | 332                               | 2436.6                            | 940.3      | 26.66                                   | 3.8        | 0.3         | 1.4         | 29.33       |
|                                 |                   | 124 237                                                        |                                   |                                   |                                   |                                   |            |                                         |            |             |             |             |
|                                 |                   | 123 896                                                        |                                   |                                   |                                   |                                   |            |                                         |            |             |             |             |



**Table S8.** Relative intensity of positive ions: metallic elements and Copper /oxygen compounds.

| Sample           | N° of tests | Intensity of substrate | Metallic elements       |    |     |      |       | Copper/oxygen compounds |                                   |                                   |                                                |
|------------------|-------------|------------------------|-------------------------|----|-----|------|-------|-------------------------|-----------------------------------|-----------------------------------|------------------------------------------------|
|                  |             |                        | <sup>65</sup> Cu (100%) | Al | Ag* | Zn*  | Si    | Cu <sub>2</sub> OH      | <sup>65</sup> CuCu <sub>3</sub> O | <sup>65</sup> CuCu <sub>4</sub> O | <sup>65</sup> CuCu <sub>4</sub> O <sub>2</sub> |
| Copper 0h        | 1 to 3      | 1 469 364              | -                       | -  | -   | -    | 19.3  | 1.23                    | 1.93                              | 2.83                              | 0.55                                           |
|                  |             | 1 449 800              |                         |    |     |      |       |                         |                                   |                                   |                                                |
|                  |             | 1 507 234              |                         |    |     |      |       |                         |                                   |                                   |                                                |
| Copper 72h       | 1 to 3      | 154 036                | -                       | -  | -   | -    | 22    | -                       | -                                 | -                                 | -                                              |
|                  |             | 89 813                 |                         |    |     |      |       |                         |                                   |                                   |                                                |
|                  |             | 111 941                |                         |    |     |      |       |                         |                                   |                                   |                                                |
| Former alloy 0h  | 1 to 3      | 575 605                | 63.3                    | -  | -   | -    | 17    | 0.69                    | 1.43                              | 1.63                              | 0.7                                            |
|                  |             | 555 940                |                         |    |     |      |       |                         |                                   |                                   |                                                |
|                  |             | 596 888                |                         |    |     |      |       |                         |                                   |                                   |                                                |
| Former alloy 72h | 1 to 3      | 95 582                 | 0.74                    | -  | -   | -    | 10.26 | -                       | -                                 | -                                 | -                                              |
|                  |             | 87 247                 |                         |    |     |      |       |                         |                                   |                                   |                                                |
|                  |             | 103 441                |                         |    |     |      |       |                         |                                   |                                   |                                                |
| New alloy 0h     | 1 à 3       | 1 435 064              | -                       | -  | -   | 5.36 | 21.6  | 1.13                    | 2.03                              | 2.53                              | 0.55                                           |
|                  |             | 1 374 332              |                         |    |     |      |       |                         |                                   |                                   |                                                |
|                  |             | 1 301 584              |                         |    |     |      |       |                         |                                   |                                   |                                                |
| New alloy 72h    | 1 à 3       | 132 125                | -                       | -  | -   | 1.16 | 11    | -                       | -                                 | -                                 | -                                              |
|                  |             | 124 237                |                         |    |     |      |       |                         |                                   |                                   |                                                |
|                  |             | 123 896                |                         |    |     |      |       |                         |                                   |                                   |                                                |

\*NB: Relative intensity of the positive ions corresponding to the Ag and Zn metallic elements has not identified by ToF- SIMS analyses. This shows that these elements has not found on the samples extreme surface.

**Table S9.** Relative intensity of positive ions: Aliphatic hydrocarbon species, Aromatic hydrocarbon species and Nitrogenous organic species.

| Sample     | N° of tests | Intensity of substrate     | Aliphatic hydrocarbon compounds |                               |                               | Aromatic hydrocarbon compounds |                               | Nitrogenous organic species |                                 |                                  |
|------------|-------------|----------------------------|---------------------------------|-------------------------------|-------------------------------|--------------------------------|-------------------------------|-----------------------------|---------------------------------|----------------------------------|
|            |             | <sup>65</sup> Cu<br>(100%) | C <sub>2</sub> H <sub>5</sub>   | C <sub>3</sub> H <sub>7</sub> | C <sub>4</sub> H <sub>9</sub> | C <sub>6</sub> H <sub>5</sub>  | C <sub>7</sub> H <sub>7</sub> | CH <sub>4</sub> N           | C <sub>3</sub> H <sub>8</sub> N | C <sub>4</sub> H <sub>10</sub> N |
| Coppe 0h   | 1 to 3      | 1 469 364                  | 57.6                            | 66.33                         | 20.66                         | 5.96                           | 4.4                           | 4                           | 193                             | 2.6                              |
|            |             | 1 449 800                  |                                 |                               |                               |                                |                               |                             |                                 |                                  |
|            |             | 1 507 234                  |                                 |                               |                               |                                |                               |                             |                                 |                                  |
| Copper 72h | 1 to 3      | 154 036                    | 1560                            | 2740                          | 1343                          | 112                            | 72                            | 105.3                       | 3020                            | 245.6                            |
|            |             | 89 813                     |                                 |                               |                               |                                |                               |                             |                                 |                                  |
|            |             | 111 941                    |                                 |                               |                               |                                |                               |                             |                                 |                                  |
| Former 0h  | 1 to 3      | 575 605                    | 265.7                           | 329.3                         | 109.66                        | 26.66                          | 26.66                         | 11.33                       | 113                             | 6.96                             |
|            |             | 555 940                    |                                 |                               |                               |                                |                               |                             |                                 |                                  |
|            |             | 596 888                    |                                 |                               |                               |                                |                               |                             |                                 |                                  |
| Former 72h | 1 to 3      | 95 582                     | 2180                            | 3360                          | 2006.66                       | 87.66                          | 87.66                         | 163.33                      | 3663.3                          | 350.66                           |
|            |             | 87 247                     |                                 |                               |                               |                                |                               |                             |                                 |                                  |
|            |             | 103 441                    |                                 |                               |                               |                                |                               |                             |                                 |                                  |
| New 0h     | 1 to 3      | 1 435 064                  | 103                             | 120                           | 49                            | 10.6                           | 9.5                           | 5.13                        | 25.33                           | 3.033                            |
|            |             | 1 374 332                  |                                 |                               |                               |                                |                               |                             |                                 |                                  |
|            |             | 1 301 584                  |                                 |                               |                               |                                |                               |                             |                                 |                                  |
| New 72h    | 1 to 3      | 132 125                    | 1950                            | 2403.3                        | 1543.33                       | 129.33                         | 81.66                         | 144.66                      | 2663.33                         | 321.66                           |
|            |             | 124 237                    |                                 |                               |                               |                                |                               |                             |                                 |                                  |
|            |             | 123 896                    |                                 |                               |                               |                                |                               |                             |                                 |                                  |

**Table S10.** Relative intensities (negative ions): sulfur and halogen species.

| Sample                 | N°<br>of<br>tests | Intensity<br>of<br>substrate | Sulfur species |         |                |         |                 |                 |                   |                                 | Nitrites/Nitrates |                 | Halogen  |
|------------------------|-------------------|------------------------------|----------------|---------|----------------|---------|-----------------|-----------------|-------------------|---------------------------------|-------------------|-----------------|----------|
|                        |                   | <sup>63</sup> Cu<br>(100%)   | S              | HS      | S <sub>2</sub> | CSN     | SO <sub>2</sub> | SO <sub>3</sub> | SO <sub>4</sub> H | S <sub>2</sub> O <sub>8</sub> H | NO <sub>2</sub>   | NO <sub>3</sub> | Cl       |
| Copper<br>0h           | 1 à 3             | 1 469 364                    | 5              | 9.23    | NM             | 2.5     | 52              | 315.33          | 60                | NM                              | 15.66             | 11.3            | 812.66   |
|                        |                   | 1 449 800                    |                |         |                |         |                 |                 |                   |                                 |                   |                 |          |
|                        |                   | 1 507 234                    |                |         |                |         |                 |                 |                   |                                 |                   |                 |          |
| Copper<br>72h          | 1 à 3             | 154 036                      | 1096.6         | 1763.33 | 77.33          | 280.33  | 2466.66         | 16200           | 13200             | 880                             | NM                | NM              | 5990     |
|                        |                   | 89 813                       |                |         |                |         |                 |                 |                   |                                 |                   |                 |          |
|                        |                   | 111 941                      |                |         |                |         |                 |                 |                   |                                 |                   |                 |          |
| Former<br>alloy<br>0h  | 1 à 3             | 575 605                      | 100.33         | 189     | -              | 174.66  | 180.66          | 514.33          | 292.66            | -                               | 109.66            | 152.66          | 648.33   |
|                        |                   | 555940                       |                |         |                |         |                 |                 |                   |                                 |                   |                 |          |
|                        |                   | 596888                       |                |         |                |         |                 |                 |                   |                                 |                   |                 |          |
| Former<br>alloy<br>72h | 1 à 3             | 95582                        | 1493.33        | 2413.33 | 138.33         | 1024.66 | 3543.33         | 24633           | 9153.33           | 1533.33                         | 114.33            | 376             | 21333.33 |
|                        |                   | 87247                        |                |         |                |         |                 |                 |                   |                                 |                   |                 |          |
|                        |                   | 103441                       |                |         |                |         |                 |                 |                   |                                 |                   |                 |          |
| New<br>alloy<br>0h     | 1 à 3             | 1 435 064                    | 33.66          | 44.66   | -              | 25.33   | 53              | 158             | 131.33            | 8.2                             | 42.66             | 58.66           | 420.66   |
|                        |                   | 1 374 332                    |                |         |                |         |                 |                 |                   |                                 |                   |                 |          |
|                        |                   | 1 301 584                    |                |         |                |         |                 |                 |                   |                                 |                   |                 |          |
| New<br>alloy<br>72h    | 1 à 3             | 132 125                      | 1136.66        | 1820    | 78.66          | 757.66  | 2633.33         | 17200           | 6380              | 1650                            | 95.98             | 290.33          | 17000    |
|                        |                   | 124 237                      |                |         |                |         |                 |                 |                   |                                 |                   |                 |          |
|                        |                   | 123 896                      |                |         |                |         |                 |                 |                   |                                 |                   |                 |          |
